# Supplementary material
Source: publisher site journal article supplement (https://www.dovepress.com/article/313068)
Supplement: Supplementary file 1 [file get_supplementary_file.php]

**Berberine ameliorates hepatic insulin resistance by regulating microRNA-146b/SIRT1 pathway**

Miao Sui<sup>1</sup>, Xiaofei Jiang<sup>1</sup>, Hongping Sun<sup>2</sup>, Chao Liu<sup>2\*</sup> and Yaofu Fan<sup>2\*</sup>

<sup>1</sup>Department of Endocrinology, Xuzhou TCM Hospital Affiliated to Nanjing University of Chinese Medicine, Xuzhou, China.

<sup>2</sup>Endocrine and Diabetes Center, Affiliated Hospital of Integrated Traditional Chinese and Western Medicine, Nanjing University of Chinese Medicine, Nanjing, China.

**Correspondence:** liuchao@nfmcn.com; fanyaofu2010@163.com



**Supplementary Fig S4.** MicroRNA target prediction databases, such as microRNA.org, showed alignment between miR-146b and SIRT1. Target analysis predicts that SIRT1 is a potential target of miR-146b in homo sapiens.

**microRNA.org - Targets and Expression**  
 Predicted microRNA targets & target downregulation scores. Experimentally observed expression patterns.  
 August 2010 Release. Last Update: 2010-11-01 [ [release notes](#) ]

target sites by: scores by: Computational Biology Center: miRanda - mirSVR 3.0 2008.08.08 CBio@MSKCC

**Display Options**  
 View target sites of conserved miRNAs with good mirSVR scores  
 Selected miRNAs: hsa-miR-146b-5p  
 You may add additional miRNAs to the box above.

**hsa-miR-146b-5p/SIRT1 Alignment**

3' ucggaUACCUAAGUCAGAGu 5' hsa-miR-146b-5p mirSVR score: -0.1514  
 ||| ||| ||||| PhastCons score: 0.5853  
 1162:5' aaugaUGAAACU-AGUUCUu 3' SIRT1

Mouseover a miRNA mature name to see the miRNA/SIRT1 alignment.

**SIRT1 sirtuin (silent mating type information regulation 2 homolog) 1 (S. cerevisiae)** Display 75 bases per row

1051 GCGAGAAAGGACAGGUCUCCACUUGGGAGGAGUUGGUGUUAUAACCAACUCUCUGCCUUGAGUUGGAGAU 1125  
 1126 GAACAGAGUAGUAAUCUUGUAUAGCAGAAUAGUUAUAGAAUUGAAACUAGUUCUUAUUAUUCUUAUUAA 1200  
 1201 AAGCTUAGCTGCTUAAAACUAGAGADCACTUUCAGUCUCAAAGCUUCUAGUCUUAAGAGUUCATAC 1275

**Supplementary Table S1.** Primers used in real-time PCR

| Gene  | Primers (5'→3')                                                  |
|-------|------------------------------------------------------------------|
| SIRT1 | Forward: GAAGTATGACAAAGATGA<br>Reverse: AGAGCTTCTTGGAGACTG       |
| FOXO1 | Forward: ACAATCTGTCCCTACACAG<br>Reverse: AAATTTGCTAAGAGCCGAGAPDH |
| GAPDH | Forward: CAAGATTGTCAGCAATGCAT<br>Reverse: TCACTGCCACTCAGAAGAC    |
